# Supplementary material for: Investigation of Mechanical, Chemical, and Antibacterial Properties of Electrospun Cellulose-Based Scaffolds Containing Orange Essential Oil and Silver Nanoparticles
Source: MDPI journal article supplement (doi:10.3390/polym14010085), 2021-12-27
Supplement: s1 [file s1]

# Investigation of Mechanical, Chemical, and Antibacterial Properties of Electrospun Cellulose-Based Scaffolds Containing Orange Essential Oil and Silver Nanoparticles

Duy-Nam Phan <sup>1,\*</sup>, Muhammad Qamar Khan <sup>2,\*</sup>, Van-Chuc Nguyen <sup>3</sup>, Hai Vu-Manh <sup>1</sup>, Anh-Tuan Dao <sup>1</sup>, Phan Thanh Thao <sup>1</sup>, Ngoc-Mai Nguyen <sup>3</sup>, Van-Tuan Le <sup>4</sup>, Azeem Ullah <sup>5</sup>, Muzamil Khatri <sup>6</sup> and Ick-Soo Kim <sup>5,\*</sup>

<sup>1</sup> School of Textile-Leather and Fashion, Hanoi University of Science and Technology, 1 Dai Co Viet, Hanoi 10000 Vietnam; hai.vumanh@hust.edu.vn (H.V.-M.); tuan.daoanh@hust.edu.vn (A.-T.D.); thao.phanthanh@hust.edu.vn (P.T.T.)

<sup>2</sup> Department of Textile and Clothing, Faculty of Textile Engineering and Technology, National Textile University, Karachi Campus, Karachi 74900, Pakistan

<sup>3</sup> School of Chemical Engineering, Hanoi University of Science and Technology, 1 Dai Co Viet, Hanoi 10000, Vietnam; chucnguyenvan85@gmail.com (C.N.V.); mai.nguyenngoc@hust.edu.vn (N.-M.N.)

<sup>4</sup> School of Mechanical Engineering, Hanoi University of Science and Technology, 1 Dai Co Viet, Hanoi 10000, Vietnam; tuan.levan@hust.edu.vn

<sup>5</sup> Nano Fusion Technology Research Group, Institute for Fiber Engineering (IFES), Interdisciplinary Cluster for Cutting Edge Research (ICCER), Shinshu University, Tokida 3-15-1, Ueda 386-8567, Nagano, Japan; 08tex101@gmail.com

<sup>6</sup> Department of Chemistry and Materials, Faculty of Textile Science and Technology, Shinshu University, Tokida 3-15-1, Ueda, Nagano 386-8567, Japan; muzamilkhatri@gmail.com

\* Correspondence: nam.phanduy@hust.edu.vn (D.-N.P.), qamarkhan154@gmail.com (M.Q.K.); kim@shinshu-u.ac.jp (I.-S.K.)

**Keywords:** cellulose nanofiber; silver nanoparticle; electrospinning; orange essential oil; antibacterial activity

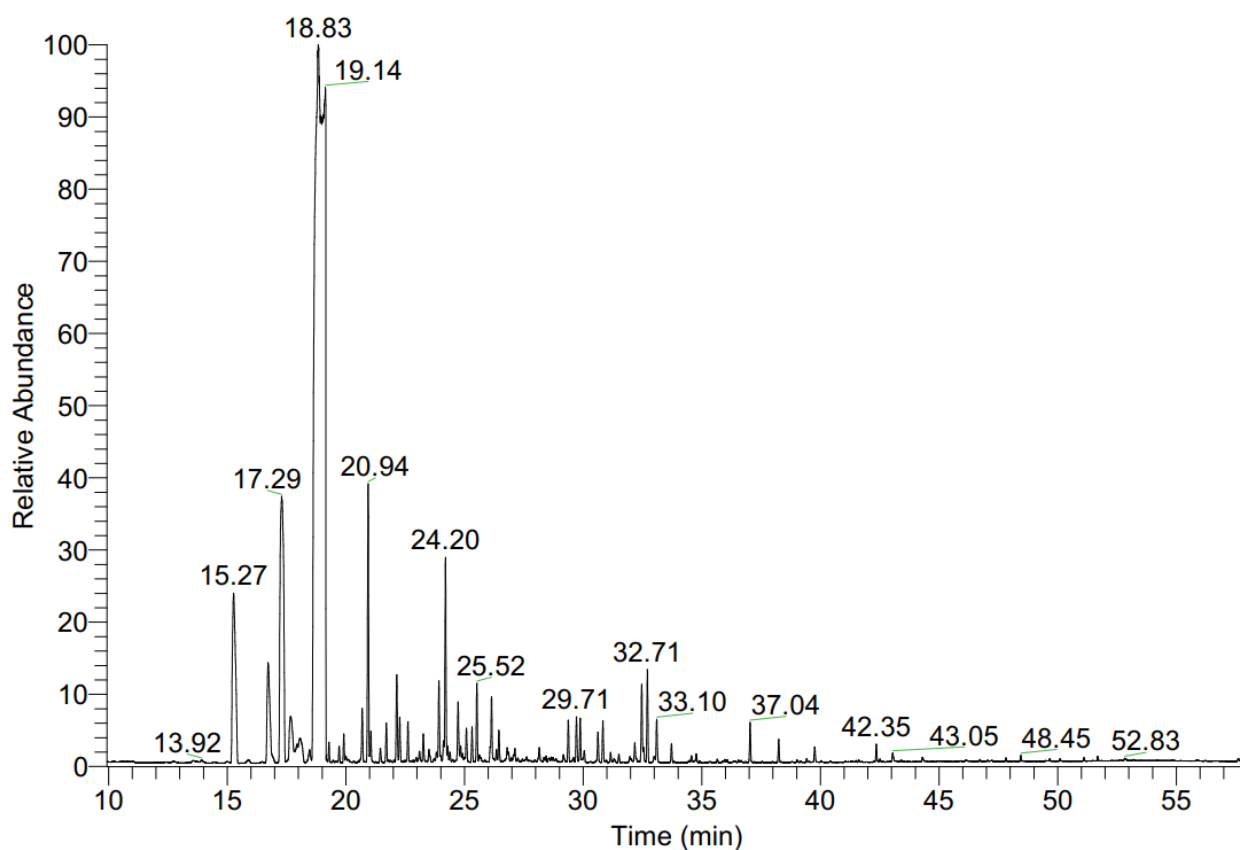

Figure S1. The total ion chromatogram of OEO

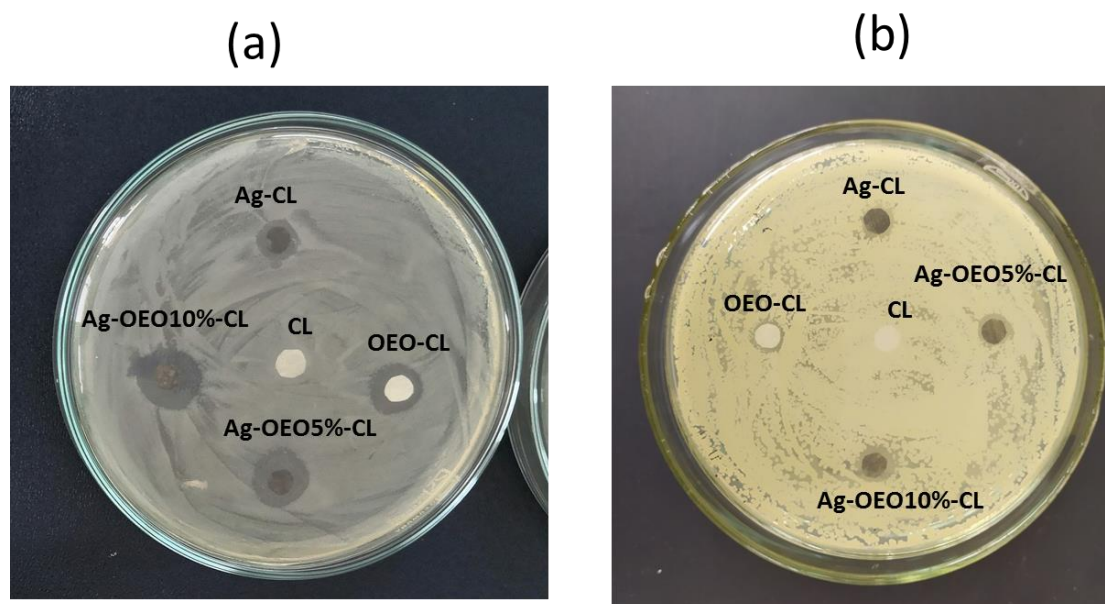

Figure S2. Representative photographs of petri dish of CL - as the negative control, OEO-CL, Ag-CL, Ag-OEO5%-CL, and Ag-OEO10%-CL against (a) *E. coli*, (b) *B. subtilis*
